# Supplementary material
Source: MDPI journal article supplement (https://www.mdpi.com/search?q=materials-12-00578)
Supplement: s001 [file materials-12-00578-s001.pdf]

Article

# N-Lipidated Amino Acids and Peptides Immobilized on Cellulose Able to Split Amide Bonds

Justyna Fraczyk \* and Zbigniew J. Kaminski

Institute of Organic Chemistry, Lodz University of Technology, Zeromskiego 116, 90-924 Lodz, Poland; [justyna.fraczyk@p.lodz.pl](mailto:justyna.fraczyk@p.lodz.pl), [zbigniew.kaminski@p.lodz.pl](mailto:zbigniew.kaminski@p.lodz.pl)

\* Correspondence: [justyna.fraczyk@p.lodz.pl](mailto:justyna.fraczyk@p.lodz.pl); Tel.: +48-426-313-321

Received: 26 January 2019; Accepted: 11 February 2019; Published: date

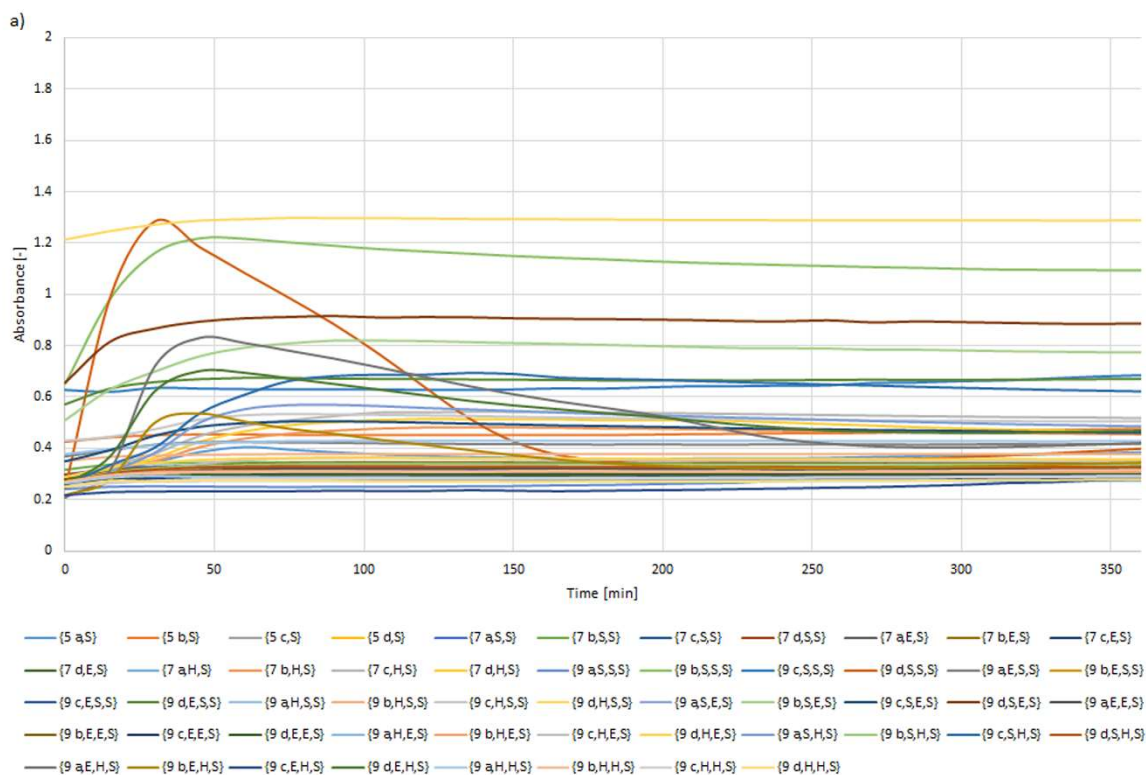

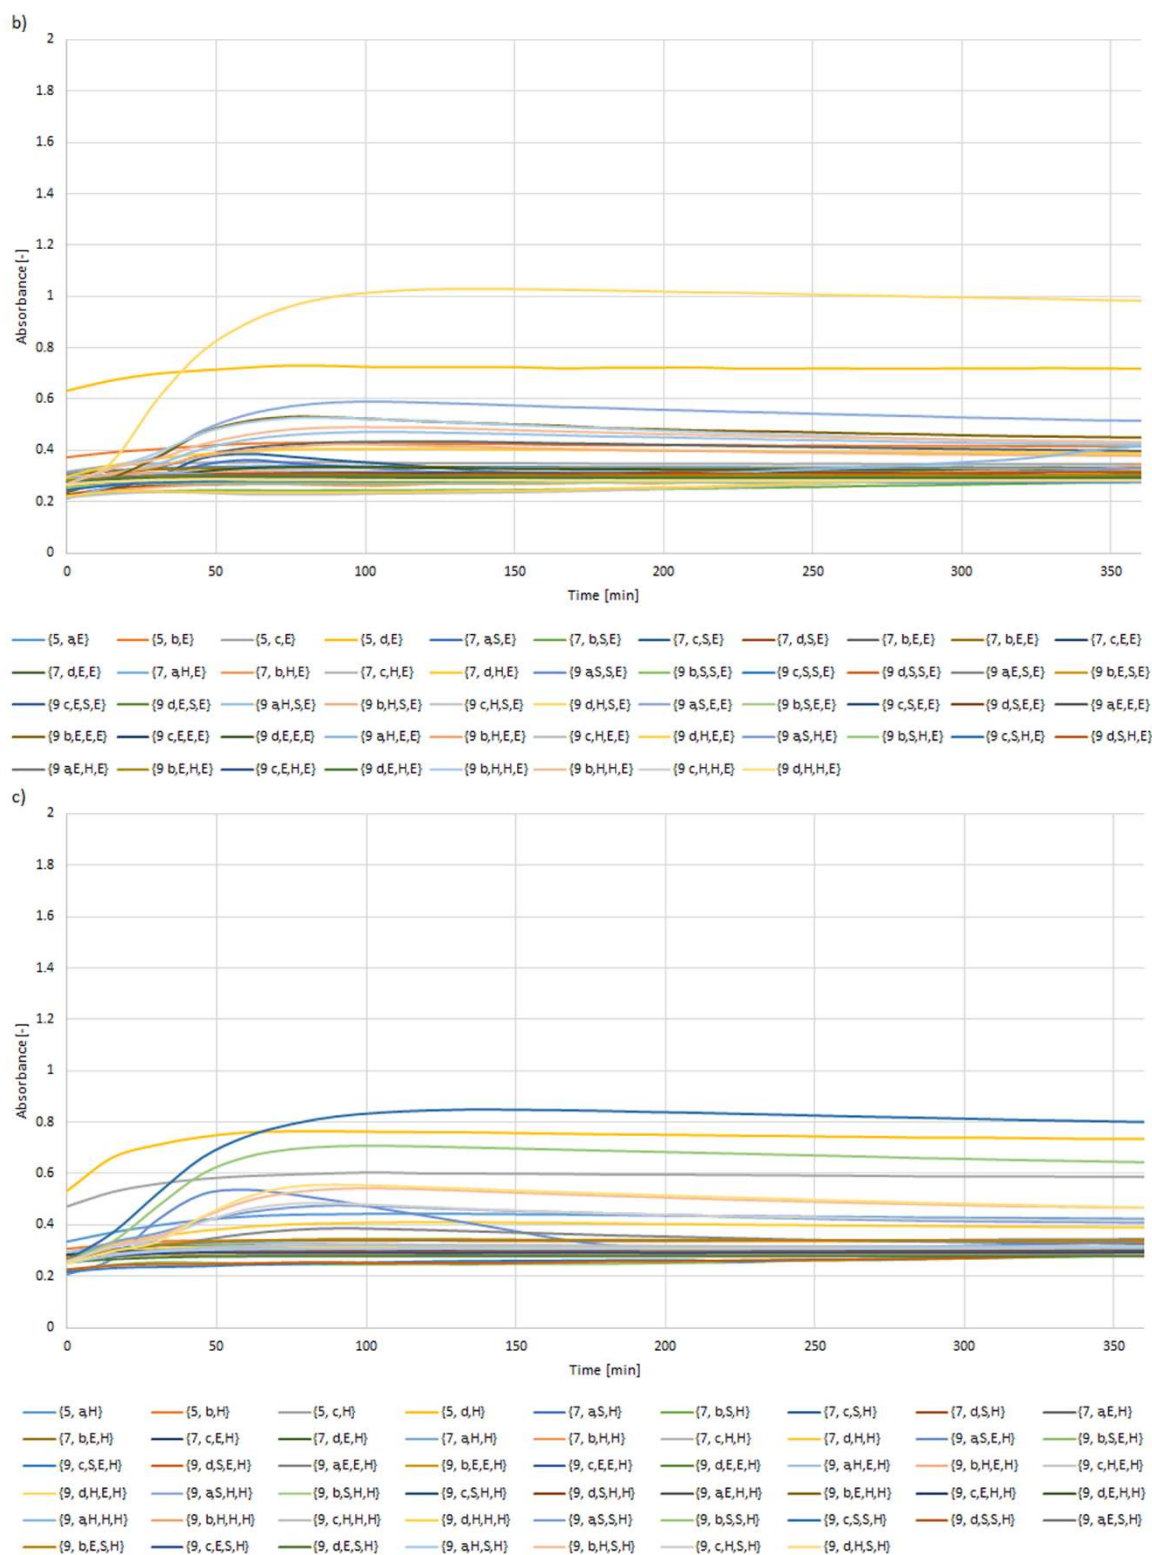

**Figure S1.** Measurement of Z-Leu-NA hydrolysis in a solution at pH = 8.5 using a library of synzymes: (a) sub-library of synzymes with serine residue at C-terminal positions, (b) sub-library of synzymes with glutamic acid residue at C-terminal positions, (c) sub-library of synzymes with histidine residue at C-terminal positions.

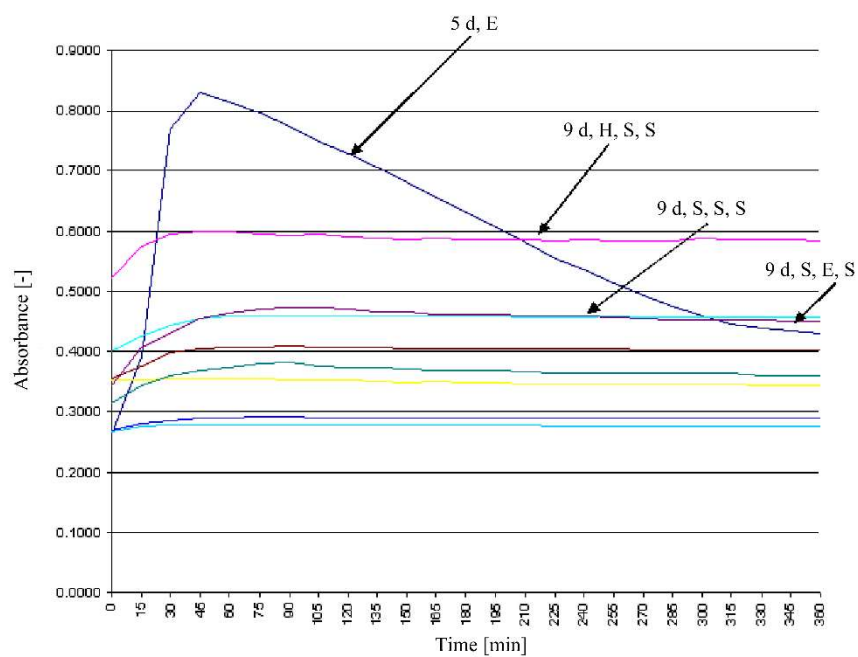

**Figure S2.** Measurement of Z-Leu-NA hydrolysis using the 9 most effective synzymes at pH 8.5 (third catalytic cycle).

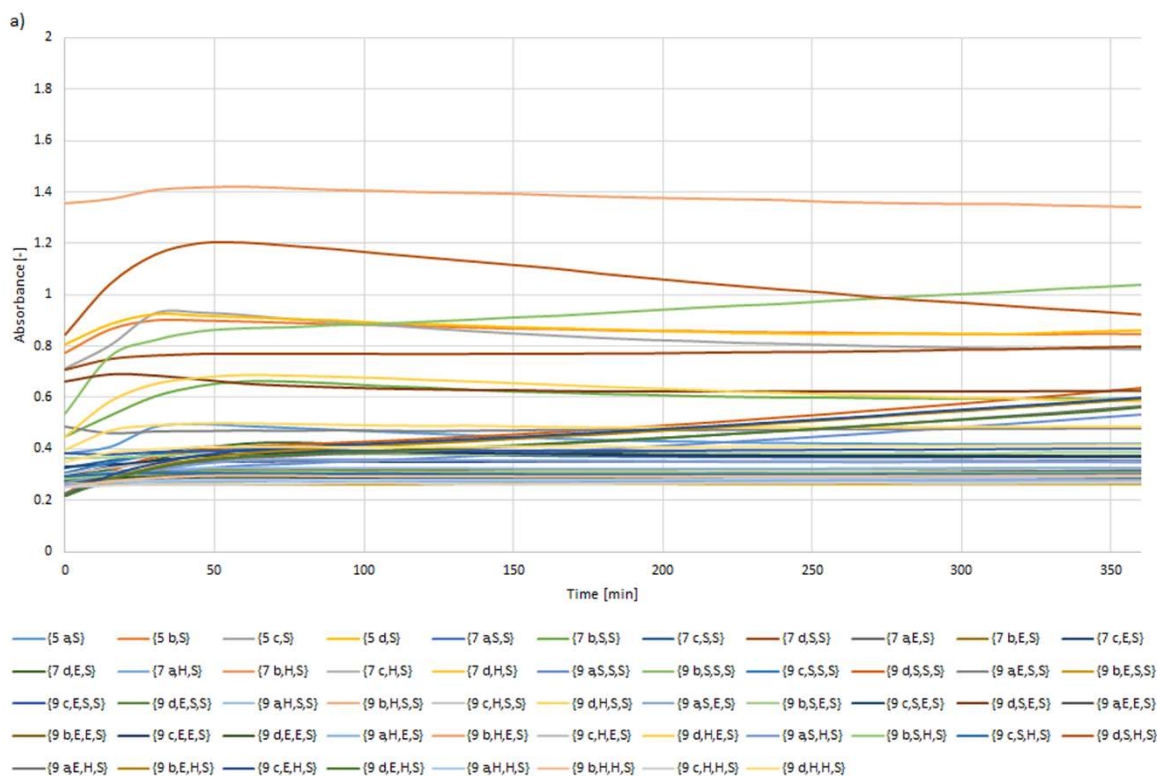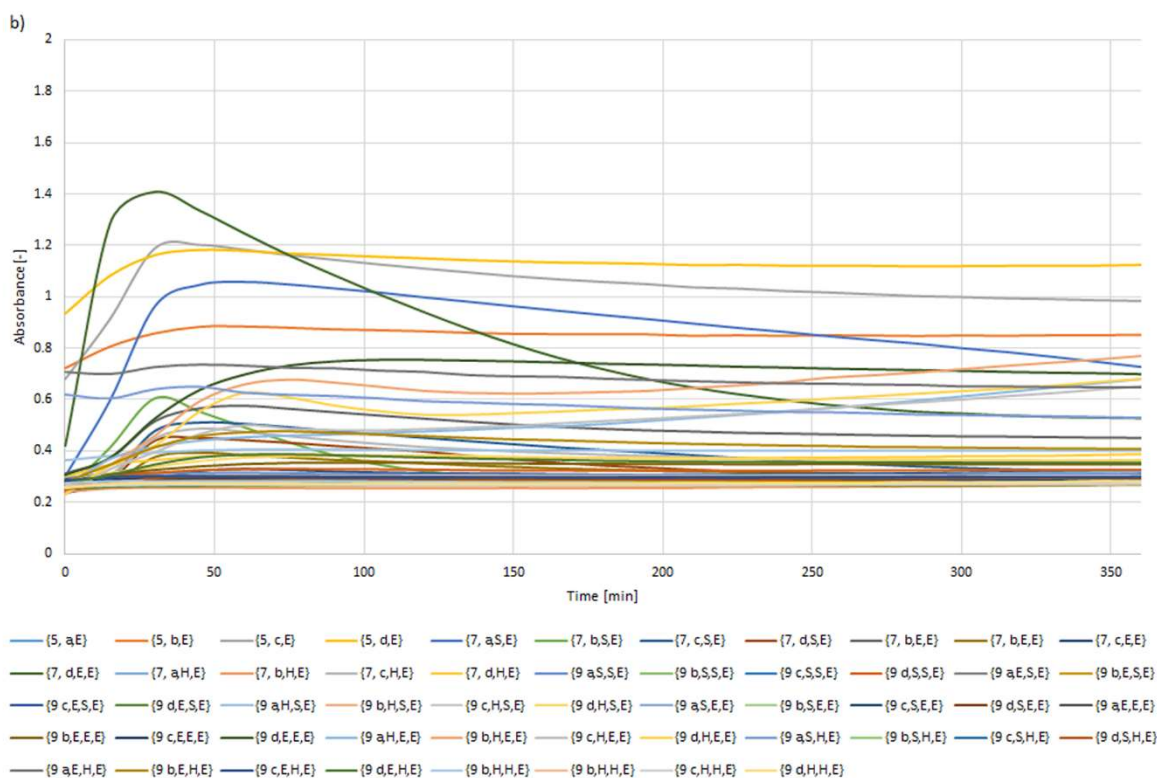

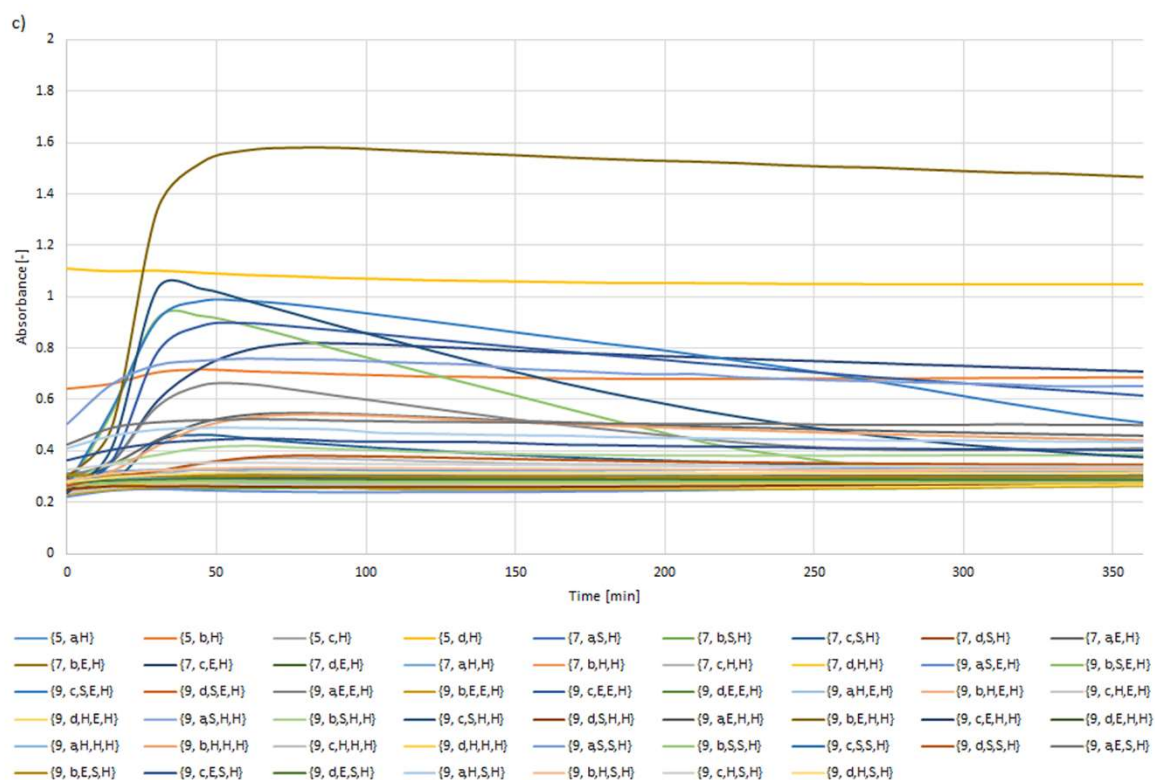

**Figure S3.** Measurement of Z-Leu-NA hydrolysis in a solution at pH = 8.5 using a library of synzymes with Cu<sup>2+</sup> ions docked in the catalytic pocket: (a) sub-library of synzymes with serine residue at C-terminal positions, (b) sub-library of synzymes with glutamic acid residue at C-terminal positions, (c) sub-library of synzymes with histidine residue at C-terminal positions.

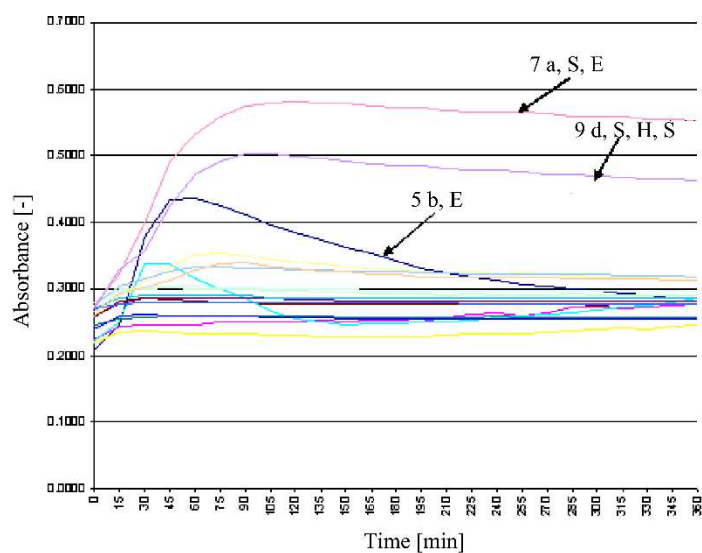

**Figure S4.** Measurement of Z-Leu-NA hydrolysis at pH 8.5 using the most effective synzymes with Cu<sup>2+</sup> docked in the active pocket (third catalytic cycle).

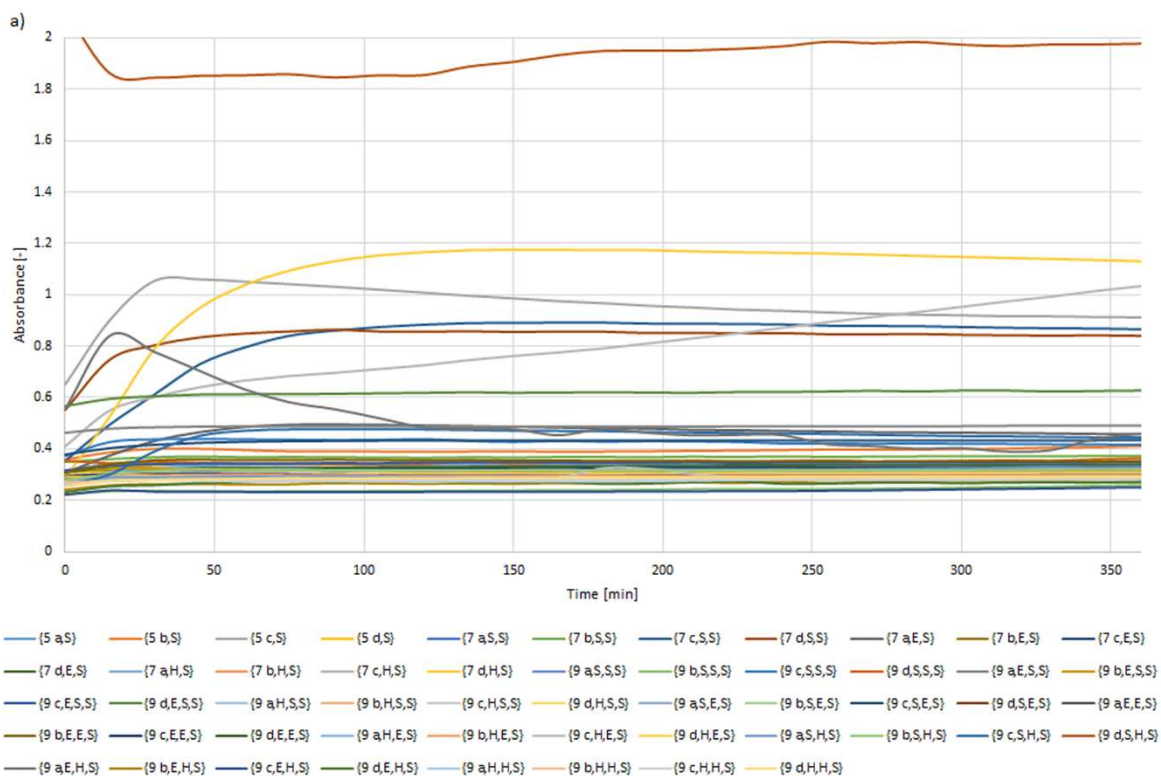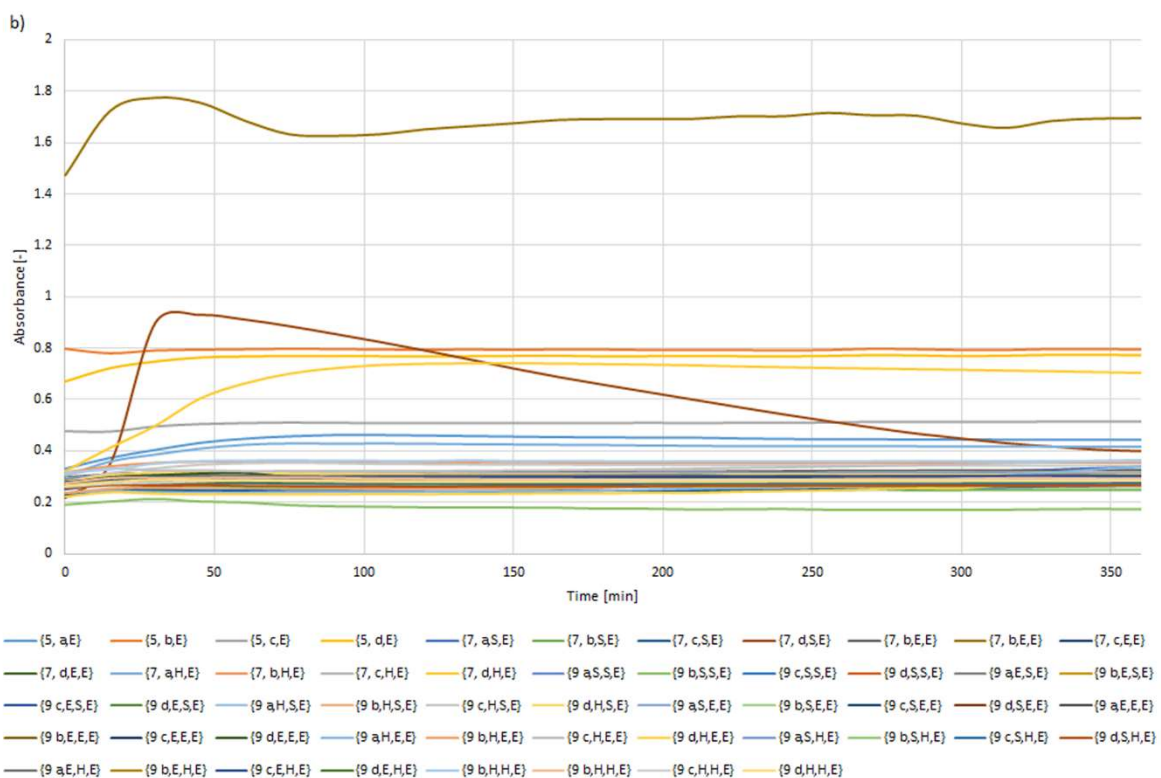

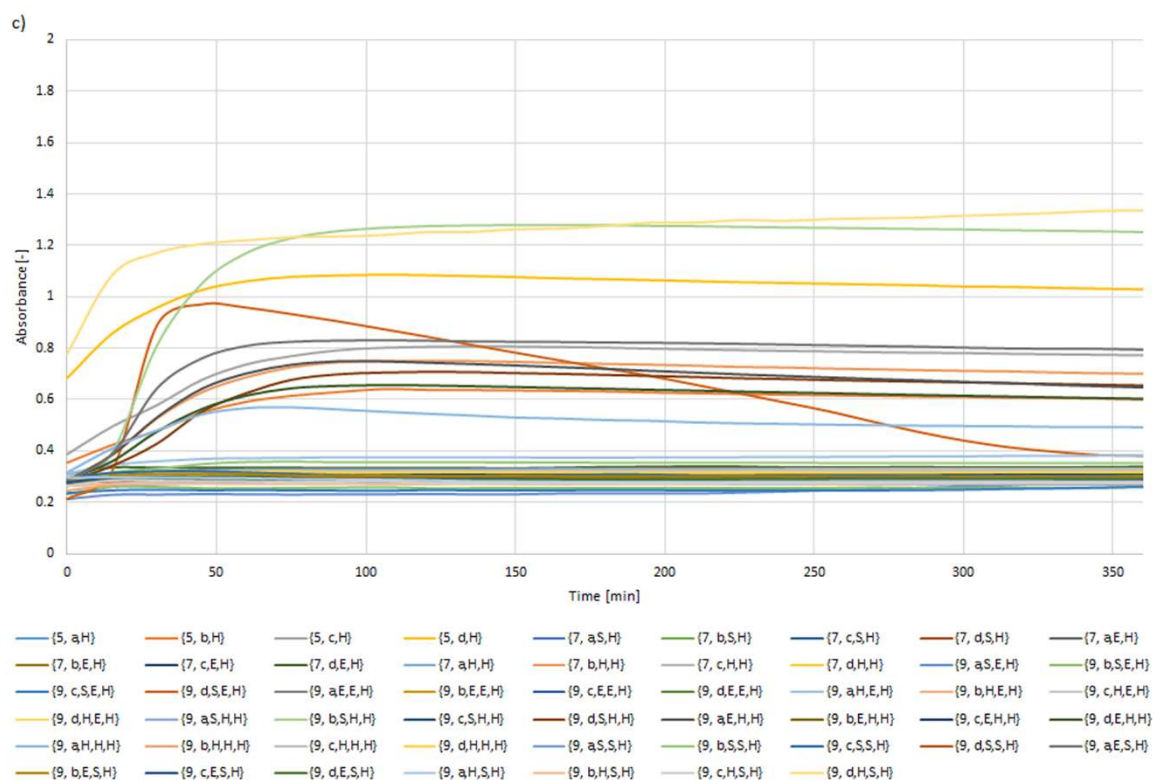

**Figure S5.** Measurement of Z-Leu-NA hydrolysis in a solution at pH = 8.5 using a library of synzymes with Zn<sup>2+</sup> ions docked in the catalytic pocket: (a) sub-library with serine residue at C-terminal positions, (b) sub-library with glutamic acid residue at C-terminal positions, (c) sub-library with histidine residue at C-terminal positions.

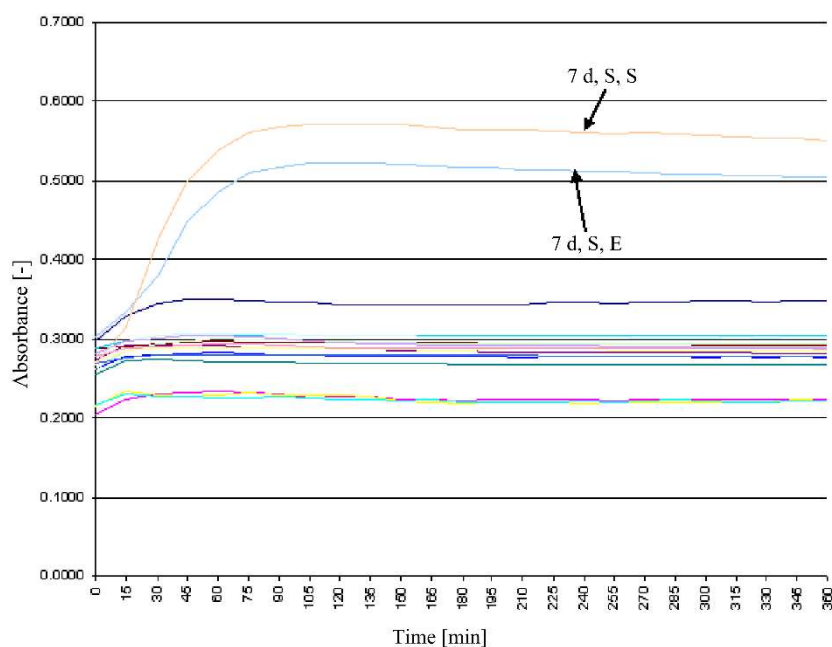

**Figure S6.** Measurement of Z-Leu-NA hydrolysis at pH 8.5 using the most effective synzymes with Zn<sup>2+</sup> ions docked in the active pocket (third catalytic cycle).
